# Supplementary material
Source: PubMed Central journal article supplement (PMC6221396)
Supplement: atv-38-2718-s004.pdf [file atv-38-2718-s004.pdf]

# Symptomatic vs Asymptomatic plaques

## 1. *In vivo* MRI T2 mapping lipid quantification

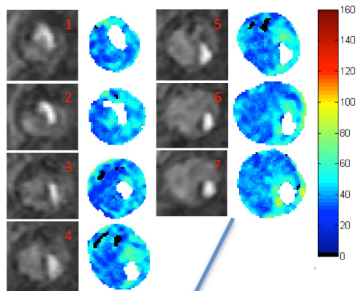

## 2. Immuno-LCM

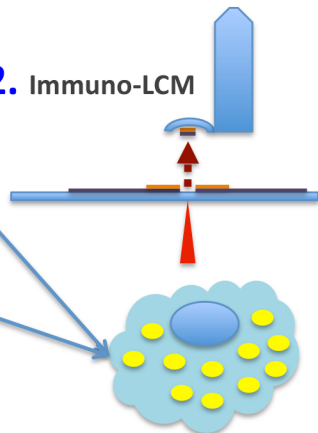

Plaque macrophage isolation

## 4. Interferon / *STAT1* correlation with plaque lipid content

## 3. Transcriptomic analysis identified differentially regulated pathways / processes by GSEA

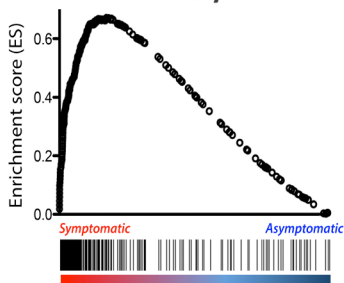

mRNA-level data (GSEA)

## 5. GWAS Convergence

*APOE*  
*ABCA1*  
*APOC1*  
*CETP*  
...  
GWAS-level data (MAGENTA)
